# Supplementary material for: Effects of Omega-3 Fatty Acids Supplementation on Serum Lipid Profile and Blood Pressure in Patients with Metabolic Syndrome: A Systematic Review and Meta-Analysis of Randomized Controlled Trials
Source: MDPI journal article supplement (doi:10.3390/foods12040725), 2023-02-07
Supplement: s1 [file s1]

# **Supplementary Materials**

**Supplement to:**

**Effects of omega-3 fatty acids supplementation on serum lipid profile and blood pressure in patients with metabolic syndrome: a systematic review and meta-analysis of randomized controlled trials**

Yin-xiu Liu, Jun-hui Yu, Ji-han Sun, Wen-qin Ma, Jin-jing Wang, Gui-ju Sun

**Table S1. Results of Subgroup Analysis**

| Index     | Subgroup              | No. of Trials | Standardized mean difference |              | <i>P</i> | I <sup>2</sup> (%) | <i>P</i> value of heterogeneity |
|-----------|-----------------------|---------------|------------------------------|--------------|----------|--------------------|---------------------------------|
|           |                       |               | mean                         | 95%CI        |          |                    |                                 |
| <b>TC</b> | Overall               | 7             | -0.02                        | -0.22, 0.18  | 0.86     | 23.7               | 0.248                           |
|           | Intervention duration |               |                              |              |          |                    |                                 |
|           | < 12 weeks            | 2             | 0.38                         | -0.13, 0.90  | 0.141    | 14.6               | 0.279                           |
|           | ≥12 weeks             | 5             | -0.09                        | -0.31, 0.13  | 0.411    | 0                  | 0.421                           |
|           |                       |               |                              |              |          |                    |                                 |
|           | Control type          |               |                              |              |          |                    |                                 |
|           | oil or placebo        | 3             | 0.01                         | -0.35, 0.38  | 0.946    | 62.2               | 0.071                           |
|           | Blank control         | 4             | -0.03                        | -0.27, 0.21  | 0.798    | 0                  | 0.468                           |
|           |                       |               |                              |              |          |                    |                                 |
|           | Study design          |               |                              |              |          |                    |                                 |
|           | parallel              | 6             | 0.04                         | -0.17, 0.26  | 0.692    | 13.6               | 0.327                           |
|           | crossover             | 1             | -0.37                        | -0.89, 0.15  | 0.162    | 0                  | -                               |
|           |                       |               |                              |              |          |                    |                                 |
|           | Study quality         |               |                              |              |          |                    |                                 |
|           | Low risk              | 3             | -0.18                        | -0.50, 0.14  | 0.26     | 45.2               | 0.161                           |
|           | High or unclear risk  | 4             | 0.09                         | -0.17, 0.35  | 0.492    | 0                  | 0.474                           |
|           |                       |               |                              |              |          |                    |                                 |
| <b>TG</b> | Overall               | 7             | -0.39                        | -0.59, -0.18 | < 0.001  | 17.2               | 0.298                           |
|           | Intervention duration |               |                              |              |          |                    |                                 |

|              |                       |   |       |              |         |      |       |
|--------------|-----------------------|---|-------|--------------|---------|------|-------|
|              | < 12 weeks            | 2 | -0.08 | -0.59, 0.42  | 0.748   | 0    | 0.339 |
|              | ≥12 weeks             | 5 | -0.45 | -0.67, -0.22 | < 0.001 | 14.8 | 0.32  |
|              |                       |   |       |              |         |      |       |
|              | Control type          |   |       |              |         |      |       |
|              | oil or placebo        | 4 | -0.45 | -0.74, -0.17 | 0.002   | 26.5 | 0.253 |
|              | Blank control         | 3 | -0.31 | -0.61, -0.01 | 0.042   | 25.7 | 0.26  |
|              |                       |   |       |              |         |      |       |
|              | Study design          |   |       |              |         |      |       |
|              | parallel              | 6 | -0.33 | -0.55, -0.11 | 0.004   | 10.5 | 0.348 |
|              | crossover             | 1 | -0.71 | -1.24, -0.18 | 0.009   | 100  | -     |
|              |                       |   |       |              |         |      |       |
|              | Study quality         |   |       |              |         |      |       |
|              | Low risk              | 4 | -0.56 | -0.82, -0.30 | < 0.001 | 0    | 0.893 |
|              | High or unclear risk  | 3 | -0.11 | -0.44, 0.22  | 0.527   | 9.2  | 0.332 |
|              |                       |   |       |              |         |      |       |
| <b>LDL-c</b> | Overall               | 5 | 0.18  | -0.18, 0.53  | 0.325   | 54.9 | 0.065 |
|              | Intervention duration |   |       |              |         |      |       |
|              | < 12 weeks            | 1 | 0.35  | -0.20, 0.90  | 0.210   | 0    | -     |
|              | ≥12 weeks             | 4 | 0.14  | -0.30, 0.58  | 0.525   | 63.6 | 0.041 |
|              |                       |   |       |              |         |      |       |
|              | Control type          |   |       |              |         |      |       |

|              |                       |   |       |             |        |      |       |
|--------------|-----------------------|---|-------|-------------|--------|------|-------|
|              | oil or placebo        | 2 | -0.05 | -0.82, 0.72 | 0.901  | 76.1 | 0.041 |
|              | Blank control         | 3 | 0.31  | -0.04, 0.65 | 0.086  | 23.9 | 0.269 |
|              |                       |   |       |             |        |      |       |
|              | Study design          |   |       |             |        |      |       |
|              | parallel              | 4 | 0.3   | 0.04, 0.56  | 0.024  | 0    | 0.445 |
|              | crossover             | 1 | -0.44 | -0.96, 0.08 | 0.099  | 0    | -     |
|              |                       |   |       |             |        |      |       |
|              | Study quality         |   |       |             |        |      |       |
|              | Low risk              | 1 | -0.44 | -0.96, 0.08 | 0.099  | 0    | -     |
|              | High or unclear risk  | 4 | 0.3   | 0.04, 0.56  | 0.0224 | 0    | 0.445 |
|              |                       |   |       |             |        |      |       |
| <b>HDL-c</b> | Overall               | 5 | 0.02  | -0.21, 0.25 | 0.882  | 0    | 0.645 |
|              | Intervention duration |   |       |             |        |      |       |
|              | < 12 weeks            | 1 | -0.09 | -0.64, 0.45 | 0.734  | 0    | -     |
|              | ≥ 12 weeks            | 4 | 0.04  | -0.21, 0.30 | 0.746  | 0    | 0.522 |
|              |                       |   |       |             |        |      |       |
|              | Control type          |   |       |             |        |      |       |
|              | oil or placebo        | 2 | -0.04 | -0.42, 0.33 | 0.815  | 0    | 0.805 |
|              | Blank control         | 3 | 0.06  | -0.24, 0.35 | 0.709  | 9.8  | 0.33  |
|              |                       |   |       |             |        |      |       |
|              | Study design          |   |       |             |        |      |       |
|              | parallel              | 4 | 0.02  | -0.24, 0.28 | 0.868  | 0    | 0.486 |
|              | crossover             | 1 | 0     | -0.51, 0.51 | 1      | 0    | -     |
|              |                       |   |       |             |        |      |       |

|  |                      |   |      |             |       |   |       |
|--|----------------------|---|------|-------------|-------|---|-------|
|  | Study quality        |   |      |             |       |   |       |
|  | Low risk             | 1 | 0    | -0.51,0.51  | 1     | 0 | -     |
|  | High or unclear risk | 4 | 0.02 | -0.24, 0.28 | 0.868 | 0 | 0.486 |

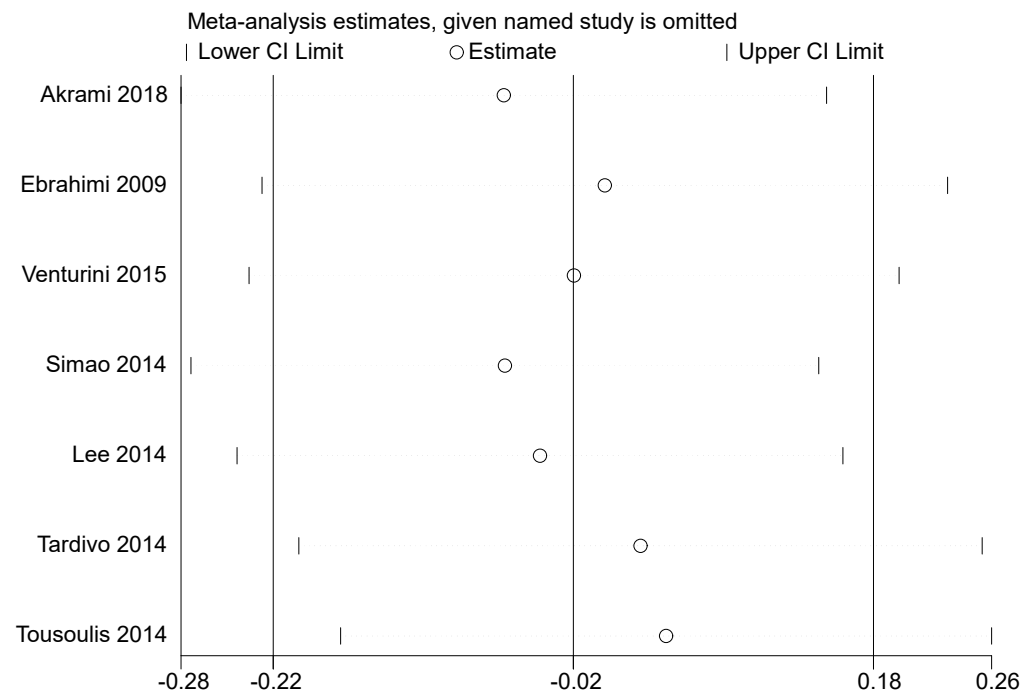

**Figure S1. sensitivity analysis of TC**

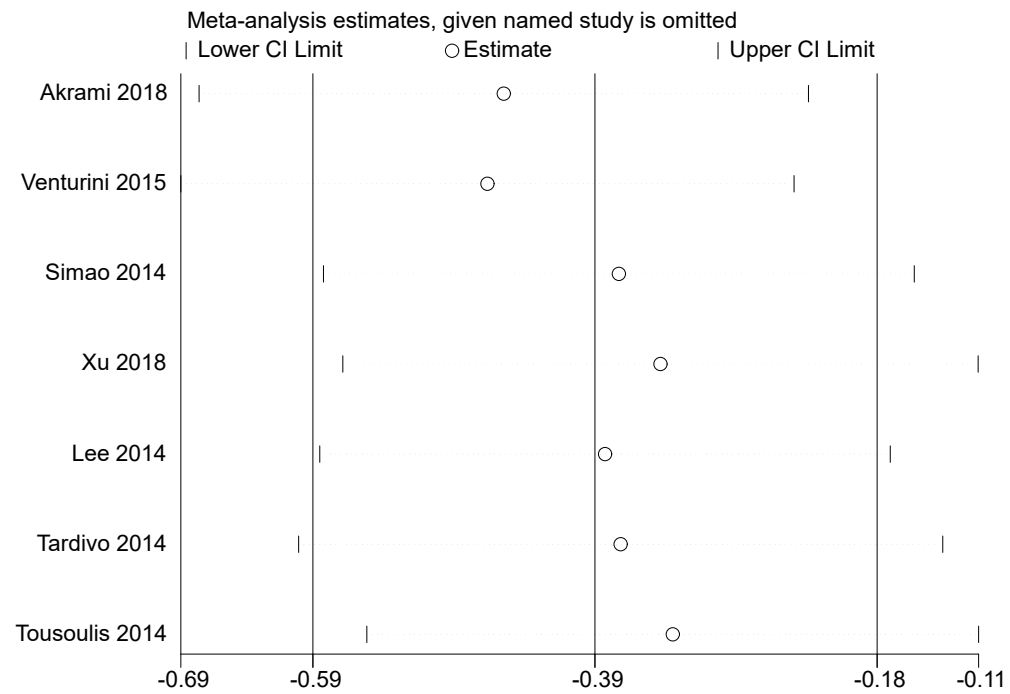

**Figure S2. sensitivity analysis of TG**

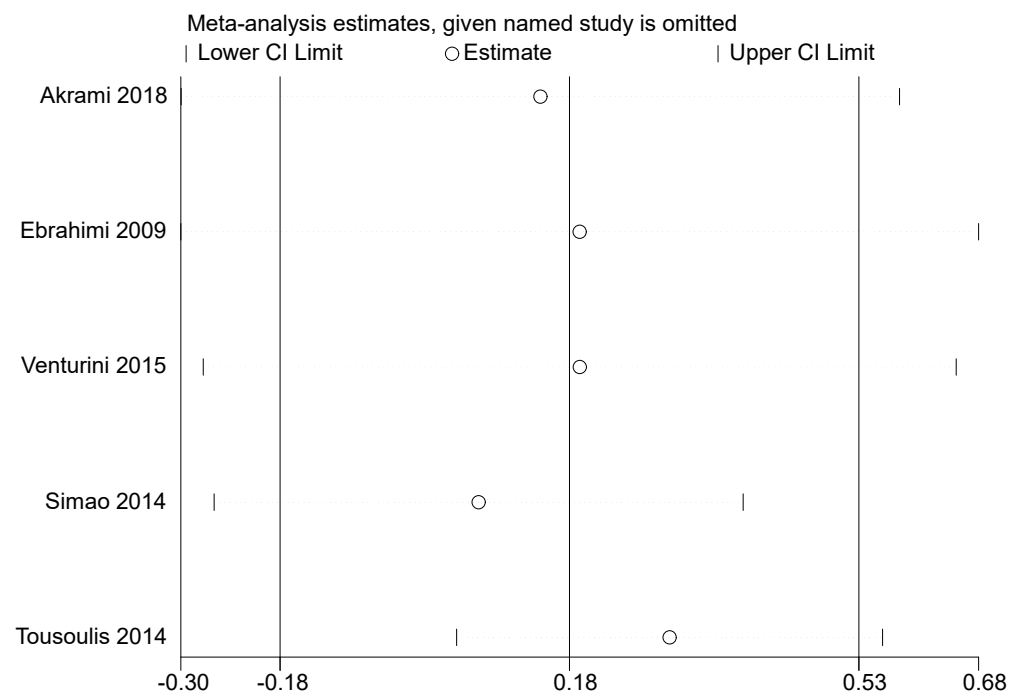

**Figure S3. sensitivity analysis of LDL-c**



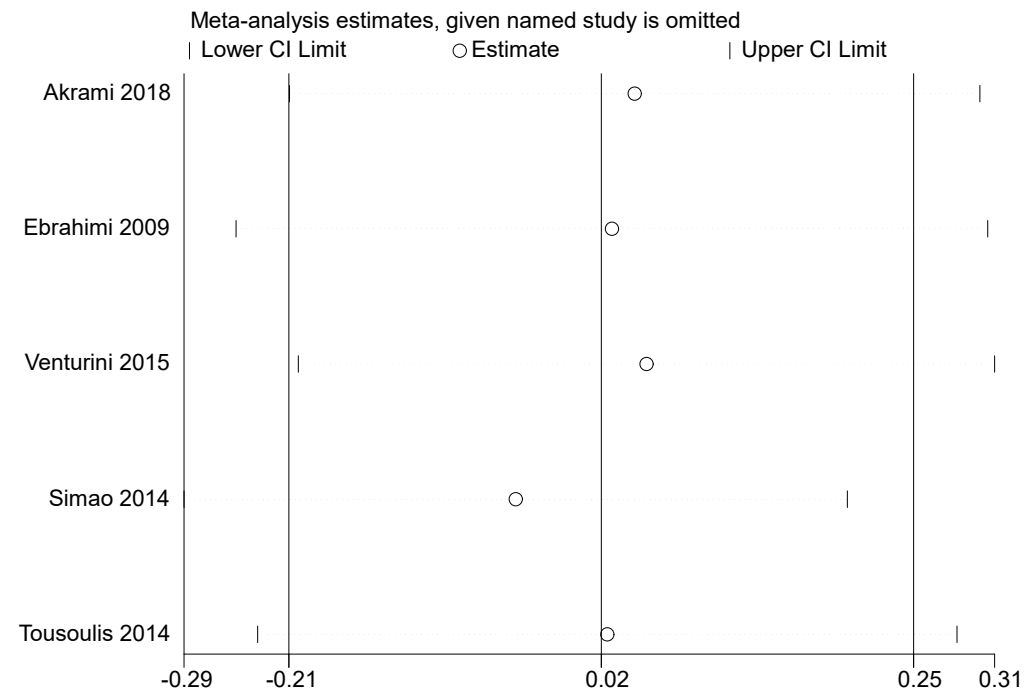

**Figure S4. sensitivity analysis of HDL-c**

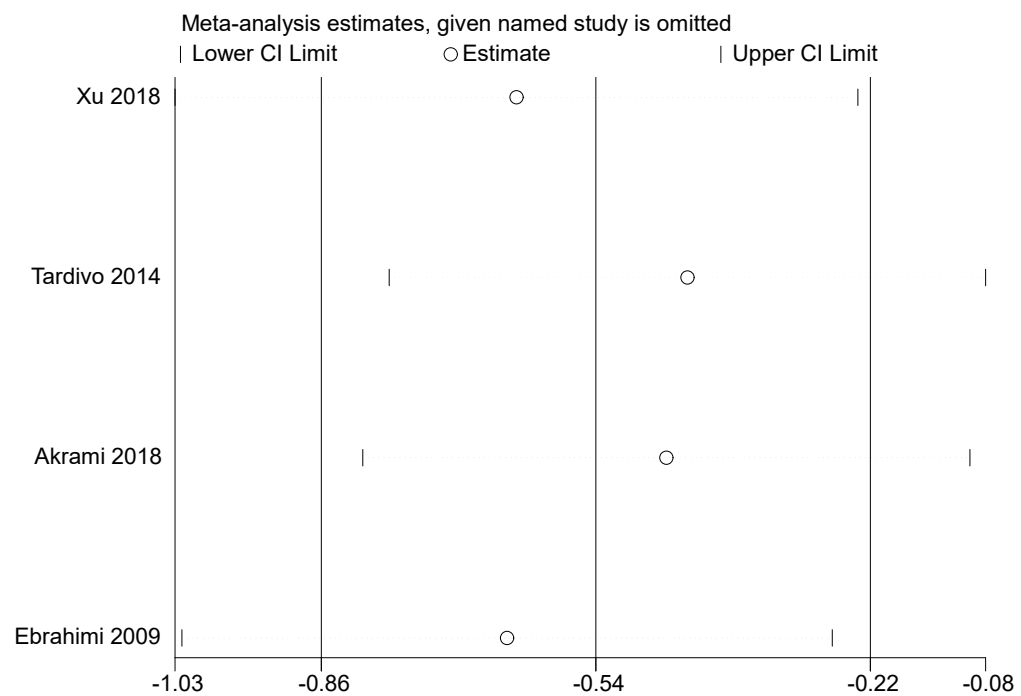

**Figure S5. sensitivity analysis of SBP**

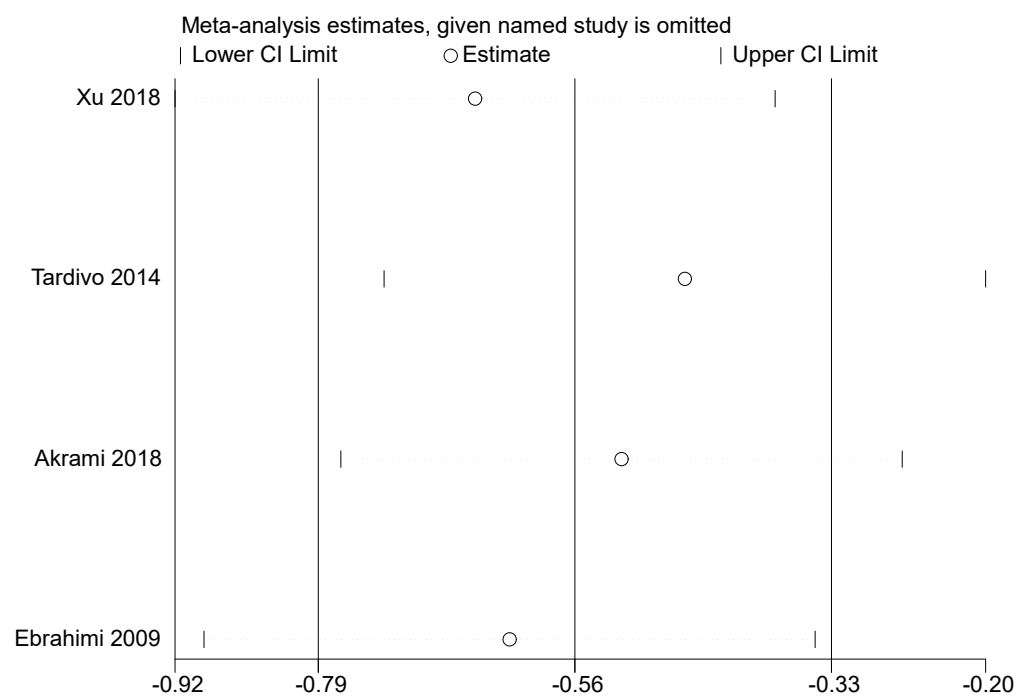

**Figure S6. sensitivity analysis of DBP**
